# Supplementary material for: Variability in air quality, ozone formation potential by VOCs, and associated air pollution attributable health risks for Delhi's inhabitants
Source: Royal Society of Chemistry journal article supplement (doi:10.1039/d4ea00064a), 2024-01-01
Supplement: d4ea00064a1.pdf [file d4ea00064a1.pdf]

(Original Title)

## Variability in Air Quality, Ozone Formation Potential by VOCs, and Associated Air Pollution Attributable Health Risks for Delhi's Inhabitants

Saurabh Sharma<sup>a</sup>, Anjum Singhal<sup>a</sup>, Veluswamy Venkatramanan<sup>b</sup>, Pawan Verma<sup>b</sup>, Mayank Pandey<sup>a\*</sup>

<sup>a</sup>P.G.D.A.V. College (Evening), University of Delhi

<sup>b</sup>Indira Gandhi National Open University

**Table ST1: Total registered motor vehicles from 2015 to 2022.**

| Vehicle Category                      | 2015-16          | 2016-17            | 2017-18            | 2018-19            | 2019-20            | 2020-21            | 2021-22          | 2022-23   |
|---------------------------------------|------------------|--------------------|--------------------|--------------------|--------------------|--------------------|------------------|-----------|
| Cars and Jeeps                        | 29,86,579        | 31,52,710          | 32,46,637          | 32,49,670          | 33,11,579          | 33,84,736          | 20,76,113        | NA        |
| Motor cycles and Scooter/two wheelers | 61,04,070        | 66,07,879          | 70,78,428          | 75,56,002          | 79,59,753          | 82,39,550          | 52,68,685        | NA        |
| Ambulances                            | 2,990            | 3059               | 3,220              | 2,358              | 2,287              | 2,289              | 1145             | NA        |
| Auto Rickshaws (Passenger)            | 1,98,137         | 1,05,399           | 1,13,074           | 1,13,240           | 1,14,891           | 1,14,869           | 93,578           | NA        |
| Taxis                                 | 91,073           | 1,18,308           | 1,18,060           | 1,09,780           | 1,22,476           | 1,12,401           | 85,033           | NA        |
| Buses                                 | 34,365           | 35,206             | 35,285             | 32,218             | 33,302             | 33,294             | 17,522           | NA        |
| Other Passenger Vehicles              | 6,368            | 59,759             | 76,231             | 81,422             | 85,477             | 91,887             | 1,14,504         | NA        |
| Tractors, All goods Vehicles & Others | 2,81,159         | 3,00,437           | 3,15,080           | 2,46,861           | 2,63,112           | 2,74,324           | 2,61,518         | NA        |
| <b>Total</b>                          | <b>97,04,741</b> | <b>1,03,82,757</b> | <b>1,09,86,015</b> | <b>1,13,91,551</b> | <b>1,18,92,877</b> | <b>1,22,53,350</b> | <b>79,17,898</b> | <b>NA</b> |

**Table ST2: Industry-wise Registered Factories in Delhi (Source: Economic Survey of NCT of Delhi 2022-23)**

| Industry                                                                                                 | 2012        | 2013        | 2014        | 2015        | 2016        | 2017        | 2018        | 2019        | 2020        | 2021        |
|----------------------------------------------------------------------------------------------------------|-------------|-------------|-------------|-------------|-------------|-------------|-------------|-------------|-------------|-------------|
| Food Product                                                                                             | 304         | 326         | 330         | 333         | 340         | 345         | 350         | 142         | 141         | 137         |
| Beverages, Tobacco and Tobacco Product                                                                   | 43          | 45          | 46          | 44          | 44          | 49          | 53          | 34          | 34          | 36          |
| Textiles products                                                                                        | 1975        | 2007        | 2033        | 2012        | 2013        | 2020        | 2008        | 1519        | 1514        | 1507        |
| Wood products, Furniture and Fixtures                                                                    | 261         | 263         | 265         | 266         | 269         | 269         | 273         | 98          | 97          | 99          |
| Paper and Paper products Printing publishing & Allied                                                    | 721         | 758         | 765         | 771         | 776         | 785         | 795         | 587         | 594         | 595         |
| Leather and Leather Fur products (except repair)                                                         | 285         | 296         | 298         | 298         | 300         | 301         | 303         | 139         | 140         | 145         |
| Rubber, Plastic, Petroleum Coal Products                                                                 | 628         | 654         | 666         | 666         | 662         | 674         | 699         | 754         | 754         | 754         |
| Chemical & Chemical products (except Petroleum & Coal)                                                   | 293         | 294         | 295         | 291         | 290         | 293         | 290         | 173         | 174         | 172         |
| Non-metallic Mineral products                                                                            | 80          | 82          | 82          | 82          | 82          | 82          | 73          | 11          | 12          | 12          |
| Basic Metal & Alloy Industry                                                                             | 524         | 526         | 525         | 523         | 519         | 524         | 517         | 775         | 770         | 756         |
| Metal products and Parts Machinery & Transport Equipment - Machine tools including Electrical Appliances | 1814        | 1872        | 1913        | 1890        | 1890        | 1902        | 1928        | 757         | 760         | 759         |
| Electricity, Gas and Stream Water Works and Supply                                                       | 103         | 104         | 104         | 104         | 109         | 126         | 132         | 195         | 206         | 206         |
| Wholesale Trade in Fuel, Chemicals, Perfumery, Ceramics Glass                                            | 35          | 59          | 73          | 95          | 91          | 97          | 99          | 0           | 2           | 5           |
| Public Administration and Defense Services                                                               | 2           | 2           | 9           | 9           | 9           | 9           | 9           | 47          | 47          | 46          |
| Sanitary Services                                                                                        | 12          | 14          | 17          | 17          | 18          | 20          | 20          | 31          | 31          | 30          |
| Repair of Capital Goods & Repair Services                                                                | 512         | 529         | 540         | 550         | 556         | 563         | 570         | 219         | 224         | 217         |
| Miscellaneous unspecified Group                                                                          | 965         | 990         | 1007        | 1003        | 1010        | 1000        | 1002        | 3141        | 3143        | 3137        |
| <b>Total</b>                                                                                             | <b>8557</b> | <b>8821</b> | <b>8968</b> | <b>8954</b> | <b>8978</b> | <b>9059</b> | <b>9121</b> | <b>8622</b> | <b>8643</b> | <b>8613</b> |

**Table ST3: Sampling Stations and Parameters**

| WHO Standards                                  |                       |                                  | Indian Standards      |                                                                        |                                                                               |
|------------------------------------------------|-----------------------|----------------------------------|-----------------------|------------------------------------------------------------------------|-------------------------------------------------------------------------------|
| Pollutant                                      | Time Weighted Average | Standard ( $\mu\text{gm}^{-3}$ ) | Time Weighted Average | Industrial, Residential, Rural and other Areas ( $\mu\text{gm}^{-3}$ ) | Ecological Sensitive Area (Notified by Central Govt.) ( $\mu\text{gm}^{-3}$ ) |
| Nitrogen dioxide ( $\text{NO}_2$ )             | Annual*               | 40                               | Annual*               | 40                                                                     | 30                                                                            |
|                                                | 24 hrs**              | 200                              | 24 hrs**              | 80                                                                     | 80                                                                            |
| Particulate Matter - 10 ( $\text{PM}_{10}$ )   | Annual*               | 10                               | Annual*               | 60                                                                     | 60                                                                            |
|                                                | 24 hrs**              | 25                               | 24 hrs**              | 100                                                                    | 100                                                                           |
| Particulate Matter - 2.5 ( $\text{PM}_{2.5}$ ) | Annual*               | 20                               | Annual*               | 40                                                                     | 40                                                                            |
|                                                | 24 hrs**              | 50                               | 24 hrs**              | 60                                                                     | 60                                                                            |
| Ozone                                          | Peak Season           | 60                               | 8 hrs                 | 100                                                                    | 100                                                                           |
|                                                | 8 Hours               | 100                              | 1 hr                  | 180                                                                    | 180                                                                           |

|         |    |    |        |    |    |
|---------|----|----|--------|----|----|
| Benzene | NA | NA | Annual | 05 | 05 |
| Toluene | NA | NA | NA     | NA | NA |

**Table ST4: Burden of diseases (PM<sub>2.5</sub>) in Delhi using the AirQ+ model.**

|            | <b>Burden of Diseases (PM<sub>2.5</sub>)</b>                        |                                                        |                                                                     |                                                        |                                                                     |                                                        |                                                                     |                                                        |
|------------|---------------------------------------------------------------------|--------------------------------------------------------|---------------------------------------------------------------------|--------------------------------------------------------|---------------------------------------------------------------------|--------------------------------------------------------|---------------------------------------------------------------------|--------------------------------------------------------|
|            | 2019                                                                |                                                        | 2020                                                                |                                                        | 2021                                                                |                                                        | 2022                                                                |                                                        |
| Mortality  | Estimated Attributable Proportion<br><br>Central% (Lower% - Upper%) | Relative Risk (RR)<br><br>Central (RR) (Lower - Upper) | Estimated Attributable Proportion<br><br>Central% (Lower% - Upper%) | Relative Risk (RR)<br><br>Central (RR) (Lower - Upper) | Estimated Attributable Proportion<br><br>Central% (Lower% - Upper%) | Relative Risk (RR)<br><br>Central (RR) (Lower - Upper) | Estimated Attributable Proportion<br><br>Central% (Lower% - Upper%) | Relative Risk (RR)<br><br>Central (RR) (Lower - Upper) |
| ALRI       | 37.63% (27.60% - 46.88%)                                            | 1.60 (1.38 – 1.88)                                     | 35.63% (25.71% - 45.04%)                                            | 1.55 (1.35 – 1.82)                                     | 37.60% (27.58% - 46.86%)                                            | 1.60 (1.38 – 1.88)                                     | 36.11% (26.15% - 45.54%)                                            | 1.57 (1.35 – 1.84)                                     |
| COPD       | 45.56% (38.42% - 52.82%)                                            | 1.84 (1.62 – 2.12)                                     | 43.30% (39.09% - 50.55%)                                            | 1.76 (1.56 – 2.02)                                     | 45.53% (38.39% - 52.80%)                                            | 1.84 (1.62 – 2.12)                                     | 43.84% (36.65% - 51.14%)                                            | 1.78 (1.58 – 2.05)                                     |
| IHD        | 56.16% (45.56% - 64.54%)                                            | 2.28 (1.84 – 2.82)                                     | 55.98% (45.55% - 64.50%)                                            | 2.27 (1.84 – 2.82)                                     | 56.16% (45.56% - 64.54%)                                            | 2.28 (1.84 – 2.82)                                     | 56.06% (45.55% - 64.56%)                                            | 2.28 (1.84 – 2.82)                                     |
| Stroke     | 65.00% (54.83% - 72.32%)                                            | 2.96 (2.86 – 3.61)                                     | 64.83% (54.52% - 72.11%)                                            | 2.84 (2.20 – 3.59)                                     | 65.00% (54.83% - 72.32%)                                            | 2.86 (2.21 – 3.61)                                     | 64.91% (54.69% - 72.23%)                                            | 2.85 (2.21 – 3.60)                                     |
| LC         | 33.61% (25.09% - 41.21%)                                            | 1.51 (1.34 – 1.70)                                     | 32.98% (24.77% - 40.42%)                                            | 1.49 (1.33 - 1.68)                                     | 33.60% (25.09% - 41.21%)                                            | 1.51(1.33 – 1.70)                                      | 33.15% (24.76% - 40.65%)                                            | 1.50 (1.33 – 1.68)                                     |
| NCDs +ALRI | 41.70% (33.36% - 48.99%)                                            | 1.72 (1.50 – 1.96)                                     | 40.05% (31.95% - 47.19%)                                            | 1.67 (1.47 – 1.89)                                     | 41.68% (33.35% - 48.97%)                                            | 1.71 (1.50 – 1.96)                                     | 40.46% (32.30% - 47.63%)                                            | 1.68 (1.48 – 1.91)                                     |

Lung cancer (LC), Acute lower respiratory infection (ALRI), Chronic obstructive pulmonary disease (COPD), Ischaemic heart disease (IHD), Non-accidental deaths (NCDs +ALRI)
